# Supplementary material for: Acid catalyzed cyclodimerization of 2,2-bis(trifluoromethyl)-4-alkoxy-oxetanes and -thietanes. Synthesis of 2,2,6,6-tetrakis(trifluoromethyl)-4,8-dialkoxy-1,5-dioxocanes and 3,3,7,7-tetrakis(trifluoromethyl)-9-oxa-2,6-dithia-bicyclo[3.3.1]nonane
Source: publisher site journal article supplement (doi:10.3762/bjoc.6.46), 2010-05-10
Supplement: Additional file 1 [file 1860-5397-6-46-S1.pdf]

# Supporting Information

for

**Acid catalyzed cyclodimerization of 2,2-bis(trifluoromethyl)-4-alkoxy-oxetanes and -thietanes. Synthesis of 2,2,6,6-tetrakis(trifluoromethyl)-4,8-dialkoxy-1,5-dioxocanes and 3,3,7,7-tetrakis(trifluoromethyl)-9-oxa-2,6-dithiabicyclo[3.3.1]nonane**

Viacheslav A. Petrov\*<sup>1</sup> and Will Marshall<sup>2</sup>

Address: <sup>1</sup>DuPont Central Research and Development (publication No 8966), Experimental Station, PO Box 800500, Wilmington DE 19880-0500, United States and <sup>2</sup>DuPont Corporate Center for Analytical Sciences, Experimental Station, PO Box 800500, Wilmington DE 19880-0500, United States

Email: Viacheslav A. Petrov - viacheslav.a.petrov@usa.dupont.com

\*Corresponding author

**Experimental details and analytical data for compounds 2a–2e, 3a–3e and 5.**

### Experimental Part.

$^1\text{H}$  and  $^{19}\text{F}$  NMR spectra were recorded on a Varian 500 (499.87 MHz) instrument, respectively, using  $\text{CFCl}_3$  or TMS as an internal standards and  $\text{CDCl}_3$  or acetone- $d_6$  as a lock solvent. The purity of isolated materials was established using NMR and GC and was 97–99%. GC and GC/MS analysis were carried out on a HP-6890 instrument, using HP FFAP capillary column and either TCD (GC) or mass selective (GS/MS) detectors, respectively. Hexafluoropropene, hexafluoroacetone (DuPont),  $\text{CF}_3\text{CH}_2\text{OH}$ ,  $(\text{CF}_3)_2\text{CHOH}$ ,  $\text{CH}_3\text{OH}$ ,  $(\text{CH}_3)_2\text{CHOH}$ ,  $\text{BF}_3\cdot\text{Et}_2\text{O}$ ,  $\text{H}_2\text{SO}_4$  (96%) (Aldrich) and were used without further purification.

Oxetanes **1a–d** were prepared using a slightly modified literature procedure [1] by bubbling hexafluoroacetone into a solution of the vinyl ether in  $\text{CH}_2\text{Cl}_2$  at 10–25 °C, followed by the removal of solvent under reduced pressure. The crude products (purity >97%, NMR) were stored refrigerated, over a small amount of solid  $\text{K}_2\text{CO}_3$  to prevent polymerization and used for further reactions without further purification. Thietanes **4a–c** were prepared according to literature procedures [2].

### Crystallography:

X-ray data for **2a**, **2b**, **2d** and **5** were collected at –100 °C using a Bruker 1K CCD system equipped with a sealed tube molybdenum source and a graphite monochromator. The structures were solved and refined using the SHELXTL [3] software package, refinement by full-matrix least squares on  $F^2$ , scattering factors from Int. Tab. Vol C Tables 4.2.6.8 and 6.1.1.4. Crystallographic data (excluding structure factors) for the structures in this paper have been deposited with the Cambridge Crystallographic Data Centre as supplementary publication nos. CCDC #761670 to #761573. Copies of the data can be obtained, free of charge, on application to CCDC, 12 Union Road, Cambridge CB2 1EZ, UK, (fax: +44 1223 336033 or e-mail: deposit@ccdc.cam.ac.uk).

### Reaction of oxetanes **1a–c** with **BF<sub>3</sub>·Et<sub>2</sub>O**.

To a stirred solution of 0.5–3 g of oxetane **1a**, **1b** or **1c** in 10–15 ml of CH<sub>2</sub>Cl<sub>2</sub> was added 1–3 drops of BF<sub>3</sub>·Et<sub>2</sub>O at ambient temperature. After the addition of the catalyst, the appearance of an intense dark blue color was observed and the reaction temperature rose to 30–35 °C. Over the next 15–30 min the color of the reaction mixture went from blue to dark red and finally brown. At this point the formation of a brown precipitate was observed. The reaction mixture was cooled to –70 °C, filtered cold and the filter cake washed several times with water and then with a small amount of cold hexane to give 0.2–1.5 g of white or slightly yellow solids, compounds **2a–c**. Analytically pure samples of **2a–c** were prepared by crystallization from hexane. Melting points and NMR and elemental analysis data for **2a–c** are given in Table 1.

### Reaction of oxetane **1d** with **BF<sub>3</sub>·Et<sub>2</sub>O**.

To a stirred solution of 26.6 g (0.1 mol) of oxetane **1d** in 50 ml of CH<sub>2</sub>Cl<sub>2</sub> was added 3 drops of BF<sub>3</sub>·Et<sub>2</sub>O at ambient temperature. Addition of the catalyst was not exothermic. The reaction mixture was stirred for 7 days at ambient temperature. At this point the conversion of **1d** was ~85% (NMR, ratio of **1d**:**2d**:**2e** – 15:15:70). The reaction mixture was washed with water (2 x 100 ml), organic layer separated, dried over MgSO<sub>4</sub> and the solvent was removed under vacuum (~100 mm Hg, <20 °C). The residue was distilled at 20 mmHg to give two fractions:

- 5 g of material bp 30–40 °C/5mmHg (olefin **2d**, *trans*-isomer, purity >98%, isolated yield 19%), crystallized on standing, mp 69–70 °C;
- 12 g of material bp 50–55 °C/5mmHg – mixture of liquid and solid materials, based on NMR mixture of **1d**, **2e** and **2d** in ratio 16:16:68. Calculated yield of **2d** - 31%.
- In the cold trap 4 g of **1d** (purity 90%, contaminated by an equal amount of **2d** and **2e**) was collected. Spectroscopic data for **2e** and **2d** are given in Table 1.

### Reaction of oxetanes **1b, c** with alcohols.

Oxetane **1** (0.02 mol) was added slowly to 20 ml of the corresponding alcohol at such a rate that the internal temperature was kept at <30 °C. The reaction mixture was stirred for

2–16 h at ambient temperature and then diluted with 200 ml of water. The organic layer was separated, washed with water, dried over MgSO<sub>4</sub> and analyzed. NMR data for compounds **3a–e** are given in Table 1.

#### **Reaction of thietanes **4a, b** with H<sub>2</sub>SO<sub>4</sub>.**

Thietane **4a** (5.4 g, 0.02 mol) or **4b** (5.6 g, 0.02 mol) was added to 25 ml of 96% H<sub>2</sub>SO<sub>4</sub> at such a rate that the reaction temperature was kept between 25–35 °C. The reaction mixture was stirred at ambient temperature for 2–16 h, poured onto crushed ice and extracted with 50 ml of CH<sub>2</sub>Cl<sub>2</sub>. The organic layer was washed with 10% solution of NaHCO<sub>3</sub>, dried over MgSO<sub>4</sub>, the solvent was removed under vacuum and the solid residue recrystallized from hexane to give 1.65 g (35%) and 2.4 g (50%) of **5**, mp 90–91 °C (from **4a**) and 91–92 °C (from **4b**), respectively. Data of <sup>1</sup>H, <sup>13</sup>C and <sup>19</sup>F NMR spectroscopy are given in Table 1. GC/MS (*m/z*, in CH<sub>2</sub>Cl<sub>2</sub>, relative intensity %): 434 (M<sup>+</sup>, C<sub>10</sub>H<sub>6</sub>F<sub>12</sub>OS<sub>2</sub><sup>+</sup>, 35%), 270 (C<sub>6</sub>H<sub>4</sub>F<sub>6</sub>OS<sub>2</sub><sup>+</sup>, 30%), 241 (40%), 209 (C<sub>5</sub>H<sub>3</sub>F<sub>6</sub>S<sup>+</sup>, 100%), 189, 171, 145 (C<sub>4</sub>H<sub>2</sub>F<sub>5</sub><sup>+</sup>), 113, 69(CF<sub>3</sub><sup>+</sup>).

#### **Reaction of thietane **4c** with H<sub>2</sub>SO<sub>4</sub>**

6.3 g (0.025 mol) of **4c** was added in small portions to 25 ml of 96% H<sub>2</sub>SO<sub>4</sub> at such a rate that the temperature of the reaction mixture was kept at <20 °C. The reaction mixture was stirred at ambient temperature for 1 h, poured onto crushed ice and extracted with 50 ml of CH<sub>2</sub>Cl<sub>2</sub>. The organic layer was washed with 10% solution of NaHCO<sub>3</sub>, dried over MgSO<sub>4</sub>, the solvent was removed under vacuum and the solid residue recrystallized from hexane to give 2.8 g (45%) of **5** mp 91–92 °C. <sup>1</sup>H, <sup>13</sup>C and <sup>19</sup>F NMR spectra of the material obtained were identical to the spectra of samples prepared from **4a** and **4b**.

**Table 1:** Yields, boiling (melting) points and NMR data for compounds **2a–e**, **3a–e** and

5.

| Entry No | Comp.                    | Yield (%) | bp (°C/mmHg)<br>(mp °C) | <sup>19</sup> F NMR <sup>a</sup><br>(δ, ppm, J, Hz) | <sup>1</sup> H NMR <sup>a</sup><br>(δ, ppm, J, Hz)                                                                                                       |
|----------|--------------------------|-----------|-------------------------|-----------------------------------------------------|----------------------------------------------------------------------------------------------------------------------------------------------------------|
| 1        | <b>2a</b> <sup>b,c</sup> | 31        | (127–128)               | –76.06 (3F, q, 10.5)<br>–77.15 (3F, q, 10.5)        | 1.2 (3H, t, 7.2)<br>2.61 (1H, d, 17.1)<br>3.04 (1H, dd, 17.1, 5.9)<br>3.63 (1H, m)<br>3.83 (1H, m)<br>5.65 (1H, d, 5.8)                                  |
| 2        | <b>2b</b> <sup>b,d</sup> | 34        | (68–69)                 | –75.63 (3F, q, 10.2)<br>–76.60 (3F, q, 10.2)        | 0.95 (3H, t, 7.6)<br>1.60 (2H, m)<br>2.58 (1H, d, 16.8)<br>2.84 (1H, dd, 16.8, 5.5)<br>3.40 (1H, m)<br>3.72 (1H, m)<br>5.53 (1H, d, 5.5)                 |
| 3        | <b>2c</b> <sup>b,e</sup> | 42        | (54–55)                 | –75.63 (3F, q, 10.2)<br>–76.60 (3F, q, 10.2)        | 0.95 (3H, t, 7.2)<br>1.41 (2H, m)<br>1.59 (2H, m)<br>2.57 (1H, d, 17.3)<br>2.84 (1H, dd, 17.3, 6.2)<br>3.45 (1H, m)<br>3.77 (1H, m)<br>5.53 (1H, d, 5.6) |

|   |           |    |          |                                                                                              |                                                                                                                                                  |
|---|-----------|----|----------|----------------------------------------------------------------------------------------------|--------------------------------------------------------------------------------------------------------------------------------------------------|
| 4 | <b>2d</b> | 30 | (69–70)  | –78.98 (s)                                                                                   | 1.35 (9H, s)<br>2.90 (1H, s)<br>5.06 (1H, d, 12.1)<br>7.00 (1H, d, 12.1)                                                                         |
| 5 | <b>2e</b> | —  | 43–55/10 | –73.14 (3F, q, 11.2)<br>–73.83 (3F, q, 11.2)<br>–75.82 (3F, q, 10.0)<br>–79.79 (3F, q, 10.0) | 1.37 (9H, s)<br>2.24 (1H, dm, 15.7)<br>2.46 (1H, dd, 15.7, 2.8)<br>5.03 (1H, d, 12.6)<br>6.61 (1H, d, 9.1)<br>5.71 (1H, s)<br>7.03 (1H, d, 12.6) |
| 6 | <b>3a</b> | —  | —        | –77.82 (3F, q, 10.2)<br>–78.16 (3F, q, 10.2)                                                 | 0.95 (3H, t, 7.5)<br>1.66 (2H, m)<br>2.24 (2H, d)<br>3.50 (3H, s)<br>3.53 (1H, m)<br>3.70 (1H, m)<br>4.85 (1H, t, 5.3)<br>5.70 (1H, s)           |

|   |           |   |   |                                                                                                          |                                                                                                                                                                          |
|---|-----------|---|---|----------------------------------------------------------------------------------------------------------|--------------------------------------------------------------------------------------------------------------------------------------------------------------------------|
| 7 | <b>3b</b> | — | — | -77.31 (3F, q, 10.2)<br>-77.72 (3F, q, 10.2)                                                             | 0.94 (3H, t, 7.5)<br>1.40 (2H, m)<br>1.60 (2H, m)<br>2.23 (2H, d, 6)<br>3.43 (3H,s)<br>3.53 (1H, m)<br>3.73 (1H, m)<br>4.83 (1H, t, 5.3)<br>5.68 (1H, s)                 |
| 8 | <b>3c</b> | — | — | -74.82 (3F,t, 7.9)<br>-76.89 (3F, q, 10.2)<br>-78.87 (3F, q, 10.2)                                       | 0.97 (3H, t, 7.4)<br>1.41 (2H, m)<br>1.65 (2H, m)<br>2.31 (2H, m)<br>2.84 (1H, dd, 17.3, 6.2)<br>3.58 (1H, m)<br>3.84 (1H, m)<br>5.08 (1H, dd, 5.4, 7.2)<br>5.26 (1H, s) |
| 9 | <b>3d</b> | — | — | -73.28 (3F,dq, 9.5,<br>5.7)<br>-77.57 (3F,dq, 9.5,<br>5.7)<br>-76.20 (3F, q, 9.5)<br>-78.72 (3F, q, 9.5) | 0.95 (3H, t, 7.5)<br>1.39 (2H, m)<br>1.64 (2H, m)<br>2.35 (2H, m)<br>3.58 (1H, m)<br>3.92 (1H, m)<br>4.39 (1H, sept, 5.5)                                                |

|    |           |       |                      |                                                           |                                                                                                                                                                                                             |
|----|-----------|-------|----------------------|-----------------------------------------------------------|-------------------------------------------------------------------------------------------------------------------------------------------------------------------------------------------------------------|
|    |           |       |                      |                                                           | 5.00 (1H, s) 5.13(1H, dd, 8.0, 4.5)                                                                                                                                                                         |
| 10 | <b>3e</b> | —     | —                    | -77.40 (3F, q, 10.0)<br>-77.54 (3F, q, 10.0)              | 0.92 (3H, t, 7.0)<br>1.18 (3, d, 6.0)<br>1.22 (3, d, 6.0)<br>1.38 (2H, m)<br>1.57 (2H, m)<br>2.20 (2H, d, 6.0)<br>3.47 (1H, m)<br>3.67 (1H, m)<br>3.93 (1H, sept, 6.0)<br>4.93 (1H, t, 6.0)<br>5.89 (1H, s) |
| 11 | <b>5</b>  | 35–50 | (91–92) <sup>f</sup> | -71.25 (3F,q, 11.0)<br>-72.31 (3F,q, 11.0) <sup>g,h</sup> | 2.83 (1H, ddq, 16.6, 8.4, 1.6)<br>3.42 (1H, dd, 16.6, 8.9)<br>5.96 (1H, t, 8.5) <sup>g,i</sup>                                                                                                              |

<sup>a</sup> in CDCl<sub>3</sub>

<sup>b</sup> Elemental analysis: Found (calcd) % for:

**2a:** C = 35.08 (35.31), H = 3.10 (3.39), F = 47.64 (47.87)

**2b:** C = 38.02 (38.11), H = 3.80 (4.00), F = 44.99 (45.21)

**2c:** C = 40.59 (40.61), H = 4.62 (4.54), F = 42.60 (42.82)

<sup>c</sup> <sup>13</sup>C NMR (CDCl<sub>3</sub>): 14.74, 36.94, 63.69, 79.06 (sept, *J* = 28.8 Hz), 96.90, 122.34 (q, *J* = 290 Hz), 122.72 (q, *J* = 290 Hz) ppm.

<sup>d</sup> <sup>13</sup>C {H} NMR (CDCl<sub>3</sub>): 13.54, 19.00, 31.10, 67.94, 79.15 (sept, *J* = 28.3 Hz), 96.90, 122.34(q, *J* = 290 Hz), 122.68 (q, *J*=290 Hz) ppm.

<sup>e</sup> <sup>13</sup>C{H} NMR (CDCl<sub>3</sub>): 10.21, 22.44, 37.00, 69.19, 69.86, 79.13 (sept, *J* = 28.3 Hz), 97.10, 122.34 (q, *J* = 290 Hz), 122.71 (q, *J* = 290 Hz) ppm.

<sup>f</sup> reported for compound **5a** : mp 91–92 °C [2].

<sup>g</sup> in acetone-*d*<sub>6</sub>

<sup>h</sup> NMR data reported for compound **5a**: <sup>1</sup>H NMR (CDCl<sub>3</sub>) : 2.72 (1H, dd, *J* = 15.0 Hz), 3.05 (1H, dd, *J* = 15.0, 5.0 Hz), 5.45(1H, t, *J* = 9.0 Hz) ppm; <sup>19</sup>F (CCl<sub>4</sub>): –70.0 (m) ppm [2].

<sup>i</sup> <sup>13</sup>C{H} NMR: (acetone-*d*<sub>6</sub>): 29.47, 55.18 (sept, *J* = 28.3 Hz), 69.77, 123.50 (qq, *J* = 282, 1.5 Hz), 123.85 (q, *J* = 282 Hz) ppm.

## References

- [1] Gambaryan, N. P.; Simonyan, L. A.; Petrovskii, P. V. *Izv. Akad. Nauk SSSR, Ser. Khim.* **1967**, 918–921.
- [2] Kitazume, T.; Otaka, T.; Takei, R.; Ishikawa, N. *Bull. Chem. Soc. Jpn.* **1976**, *49*, 2491–2494.
- [3] Sheldrick, G.; SHELXTL Software Suite, v. 6.0, Bruker Axes Corp.: Madison WI, 1996.
